# Supplementary material
Source: publisher figshare collection journal article supplement (https://karger.figshare.com/articles/dataset/_/5122849)
Supplement: Supplementary file 2 [file 1]

**Table S1.** Antigen presenting cells in Hashimoto's thyroiditis in comparison with the control group, simple goiter, and nodular goiter - Kruskal-Wallis test. Statistically significant differences at  $p < 0,05$

|                                             | Antigen presenting cells<br>CD1a+ |               | p value for<br>comparison to<br>the control<br>group | p value for<br>comparison to<br>simple goitre | p value for<br>comparison to<br>nodular goitre |
|---------------------------------------------|-----------------------------------|---------------|------------------------------------------------------|-----------------------------------------------|------------------------------------------------|
|                                             | mean $\pm$ SD<br>[%]              | median<br>[%] |                                                      |                                               |                                                |
| Hashimoto's<br>thyroiditis<br>mean          | 0,73 $\pm$ 9,63                   | 0,8           | 0,002                                                | 0,035                                         | 0,002                                          |
| Hashimoto's<br>thyroiditis<br>parenchyma    | 0,64 $\pm$ 0,53                   | 1,0           | 0,004                                                | 0,052                                         | 0,004                                          |
| Hashimoto's<br>thyroiditis<br>infiltrations | 0,74 $\pm$ 0,42                   | 1,0           | 0,002                                                | 0,028                                         | 0,002                                          |
| Nodular<br>goitre                           | 0,12 $\pm$ 0,06                   | 0,1           | 1,000                                                | 1,000                                         | x                                              |
| Simple goitre                               | 0,30 $\pm$ 0,64                   | 0,1           | 1,000                                                | x                                             | 1,000                                          |
| Control<br>group                            | 0,14 $\pm$ 0,05                   | 0,1           | x                                                    | 1,000                                         | 1,000                                          |

**Table S2.** The subset of T cells in Hashimoto's thyroiditis in comparison to the control group, simple goitre, and nodular goitre - Kruskal-Wallis test. Statistically significant differences at  $p < 0,05$

|                                       | T cellsCD3+       |            | p value for comparison to the control group | p value for comparison to simple goitre | p value for comparison to nodular goitre |
|---------------------------------------|-------------------|------------|---------------------------------------------|-----------------------------------------|------------------------------------------|
|                                       | mean $\pm$ SD [%] | median [%] |                                             |                                         |                                          |
| Hashimoto's thyroiditis mean          | 30,38 $\pm$ 10,08 | 31,5       | 0,000                                       | 0,000                                   | 0,000                                    |
| Hashimoto's thyroiditis parenchyma    | 22,8 $\pm$ 14,02  | 22,0       | 0,000                                       | 0,000                                   | 0,324                                    |
| Hashimoto's thyroiditis infiltrations | 38,89 $\pm$ 16,59 | 38,0       | 0,000                                       | 0,000                                   | 0,000                                    |
| Nodular goitre                        | 14,71 $\pm$ 11,44 | 14,5       | 0,001                                       | 0,005                                   | x                                        |
| Simple goitre                         | 3,96 $\pm$ 0,45   | 0,7        | 0,005                                       | x                                       | 0,000                                    |
| Control group                         | 1,04 $\pm$ 0,26   | 1,1        | x                                           | 1,000                                   | 0,324                                    |

**Table S3.** The subset of T helper cells in Hashimoto's thyroiditis in comparison to the control group, simple goitre, and nodular goitre - Kruskal-Wallis test. Statistically significant differences at  $p < 0,05$

|                                              | <b>T helper cells CD4+</b>        |                   | <b>p value for comparison to the control group</b> | <b>p value for comparison to simple goitre</b> | <b>p value for comparison to nodular goitre</b> |
|----------------------------------------------|-----------------------------------|-------------------|----------------------------------------------------|------------------------------------------------|-------------------------------------------------|
|                                              | <b>mean<math>\pm</math>SD [%]</b> | <b>median [%]</b> |                                                    |                                                |                                                 |
| <b>Hashimoto's thyroiditis mean</b>          | <b>0,93<math>\pm</math>0,99</b>   | <b>1,0</b>        | 0,000                                              | 1,000                                          | 0,000                                           |
| <b>Hashimoto's thyroiditis parenchyma</b>    | <b>0,53<math>\pm</math>0,07</b>   | <b>0,0</b>        | 0,000                                              | 1,000                                          | 0,000                                           |
| <b>Hashimoto,s thyroiditis infiltrations</b> | <b>1,33<math>\pm</math>0,01</b>   | <b>1,0</b>        | 0,512                                              | 0,146                                          | 0,538                                           |
| <b>Nodular goitre</b>                        | <b>2,03<math>\pm</math>1,06</b>   | <b>2,1</b>        | 1,000                                              | 0,000                                          | x                                               |
| <b>Simple goitre</b>                         | <b>1,05<math>\pm</math>2,71</b>   | <b>0,1</b>        | 0,000                                              | x                                              | 0,000                                           |
| <b>Control group</b>                         | <b>0,19<math>\pm</math>0,05</b>   | <b>0,2</b>        | x                                                  | 0,000                                          | 1,000                                           |

**Table S4.** The subset of T suppressor-cytotoxic cells in Hashimoto's thyroiditis in comparison to the control group, simple goitre, and nodular goitre - Kruskal-Wallis test. Statistically significant differences at  $p < 0,05$

|                                       | T suppressor-cytotoxic cells CD8+ |            | p value for comparison to the bcontrol group | p value for comparison to simple goitre | p value for comparison to nodular goitre |
|---------------------------------------|-----------------------------------|------------|----------------------------------------------|-----------------------------------------|------------------------------------------|
|                                       | mean $\pm$ SD [%]                 | median [%] |                                              |                                         |                                          |
| Hashimoto's thyroiditis mean          | 20,54 $\pm$ 0,68                  | 17,5       | 0,000                                        | 0,000                                   | 0,001                                    |
| Hashimoto's thyroiditis parenchyma    | 17,32 $\pm$ 14,09                 | 11,4       | 0,004                                        | 0,000                                   | 0,003979                                 |
| Hashimoto,s thyroiditis infiltrations | 23,76 $\pm$ 8,70                  | 23,0       | 0,000                                        | 0,000                                   | 0,000                                    |
| Nodular goitre                        | 8,53 $\pm$ 2,37                   | 8,6        | 1,000                                        | 0,039                                   | x                                        |
| Simple goitre                         | 4,01 $\pm$ 5,54                   | 2,3        | 0,039                                        | x                                       | 0,039                                    |
| Control group                         | 0,65 $\pm$ 0,30                   | 0,7        | x                                            | 0,764                                   | 1,000                                    |

**Table S5.** The subset of B cells in Hashimoto's thyroiditis in comparison to the control group, simple goitre, and nodular goitre - Kruskal-Wallis test. Statistically significant differences at  $p < 0,05$

|                                              | <b>Plasma cells CD79 alpha+</b> |                   | <b>p value for comparison to the control group</b> | <b>p value for comparison to simple goitre</b> | <b>p value for comparison to nodular goitre</b> |
|----------------------------------------------|---------------------------------|-------------------|----------------------------------------------------|------------------------------------------------|-------------------------------------------------|
|                                              | <b>mean±SD [%]</b>              | <b>median [%]</b> |                                                    |                                                |                                                 |
| <b>Hashimoto's thyroiditis mean</b>          | <b>31,65±9,11</b>               | <b>30,0</b>       | 0,000                                              | 0,000                                          | 0,000                                           |
| <b>Hashimoto's thyroiditis parenchyma</b>    | <b>17,23±6,35</b>               | <b>16,5</b>       | 0,001                                              | 0,000                                          | 0,001                                           |
| <b>Hashimoto,s thyroiditis infiltrations</b> | <b>46,67±17,80</b>              | <b>41,3</b>       | 0,000                                              | 0,000                                          | 0,000                                           |
| <b>Nodular goitre</b>                        | <b>5,22±1,63</b>                | <b>5,5</b>        | 1,000                                              | 0,362                                          | x                                               |
| <b>Simple goitre</b>                         | <b>1,83±0,64</b>                | <b>0,4</b>        | 0,362                                              | x                                              | 0,362                                           |
| <b>Control group</b>                         | <b>4,11±1,94</b>                | <b>3,9</b>        | x                                                  | 0,362                                          | 1,000                                           |
