# Supplementary material
Source: publisher figshare collection journal article supplement (https://karger.figshare.com/articles/dataset/_/5122849)

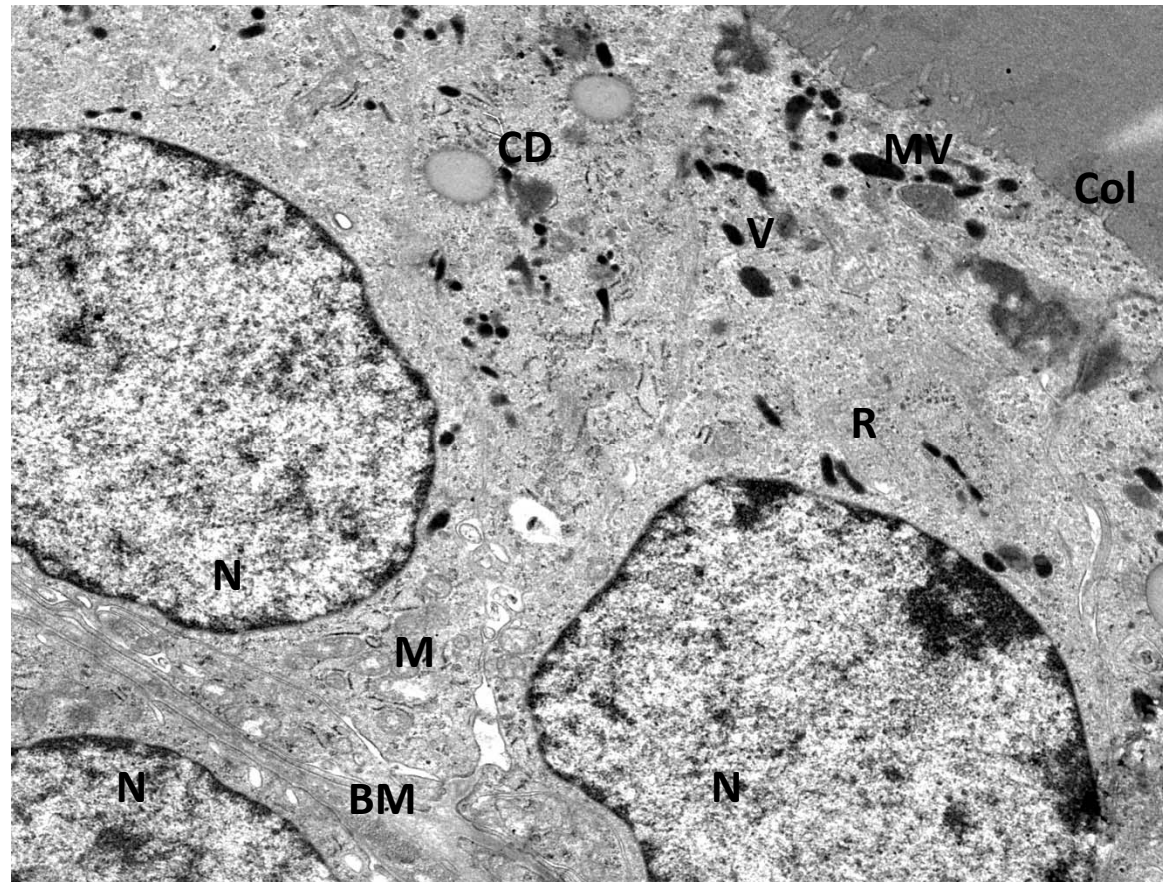

**Phot. 1**

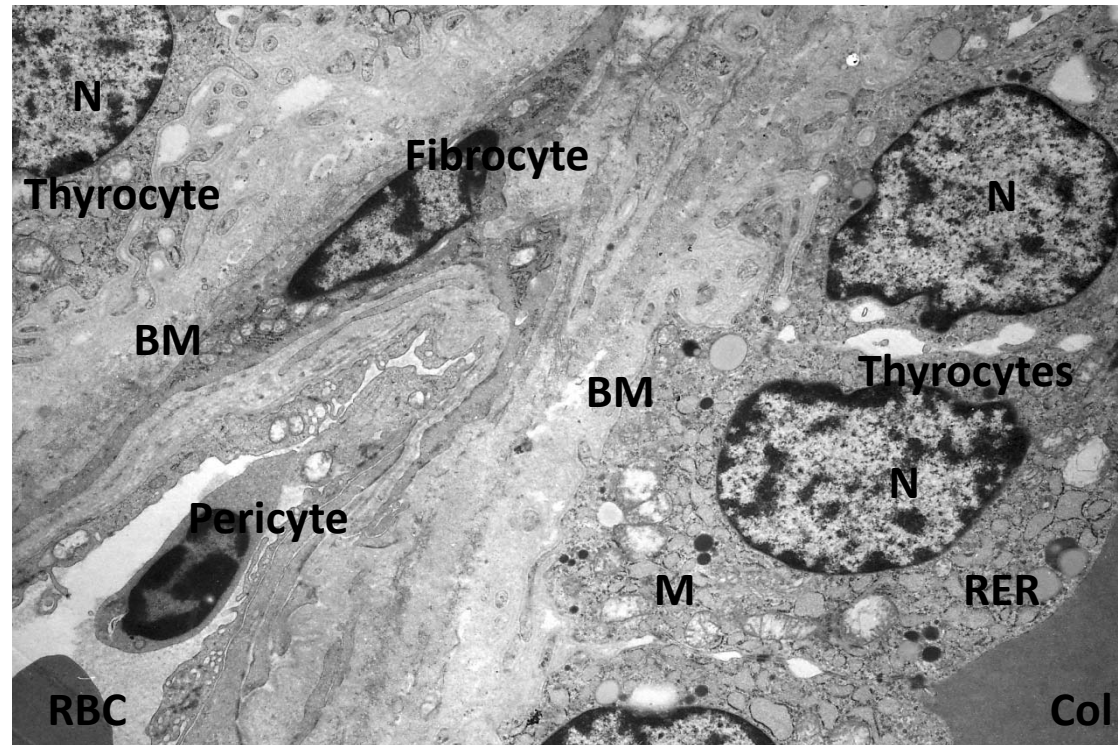

**Phot. 2**

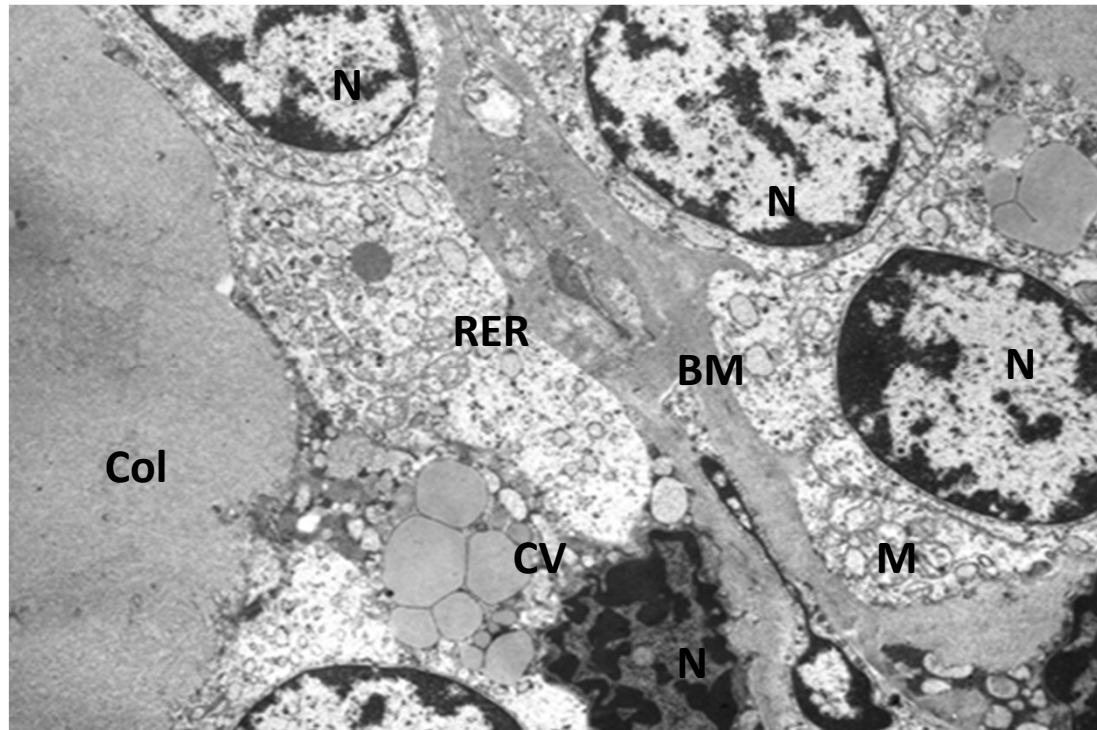

Phot. 3

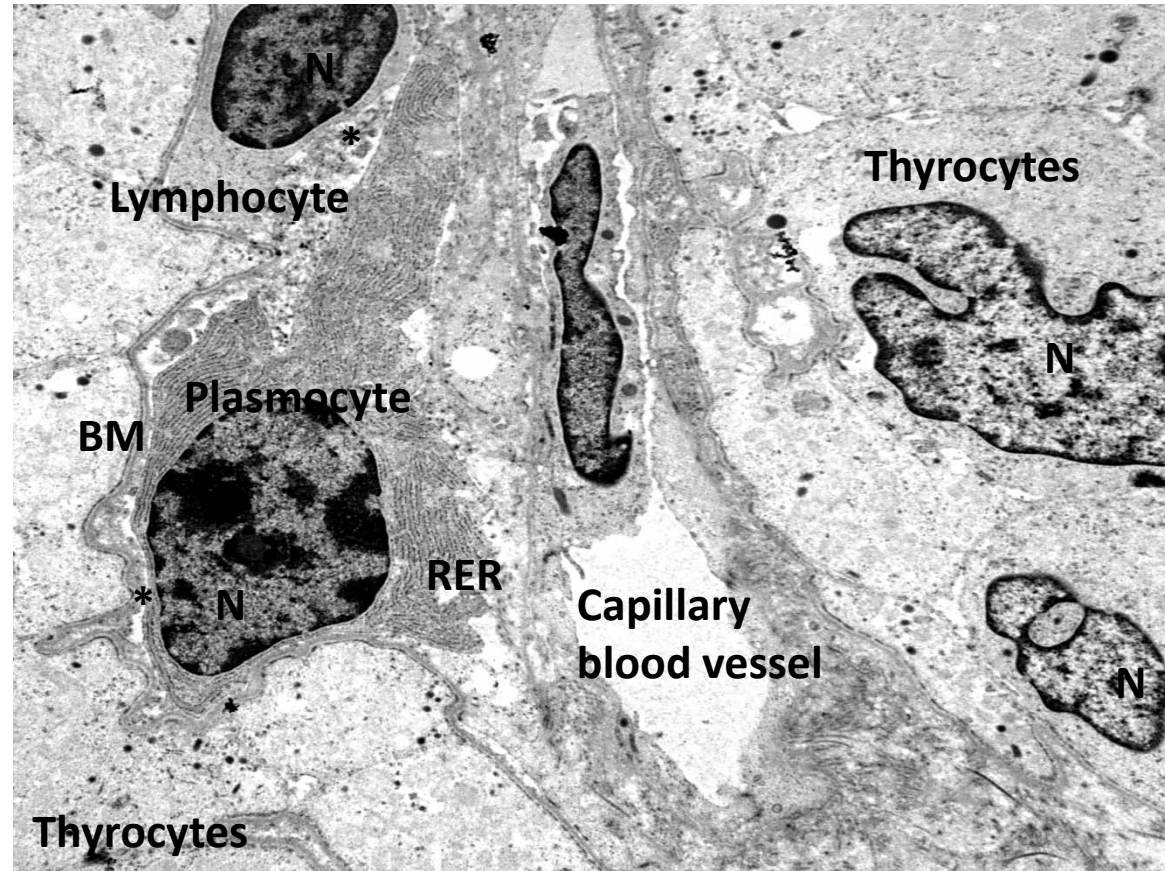

**Phot.4**

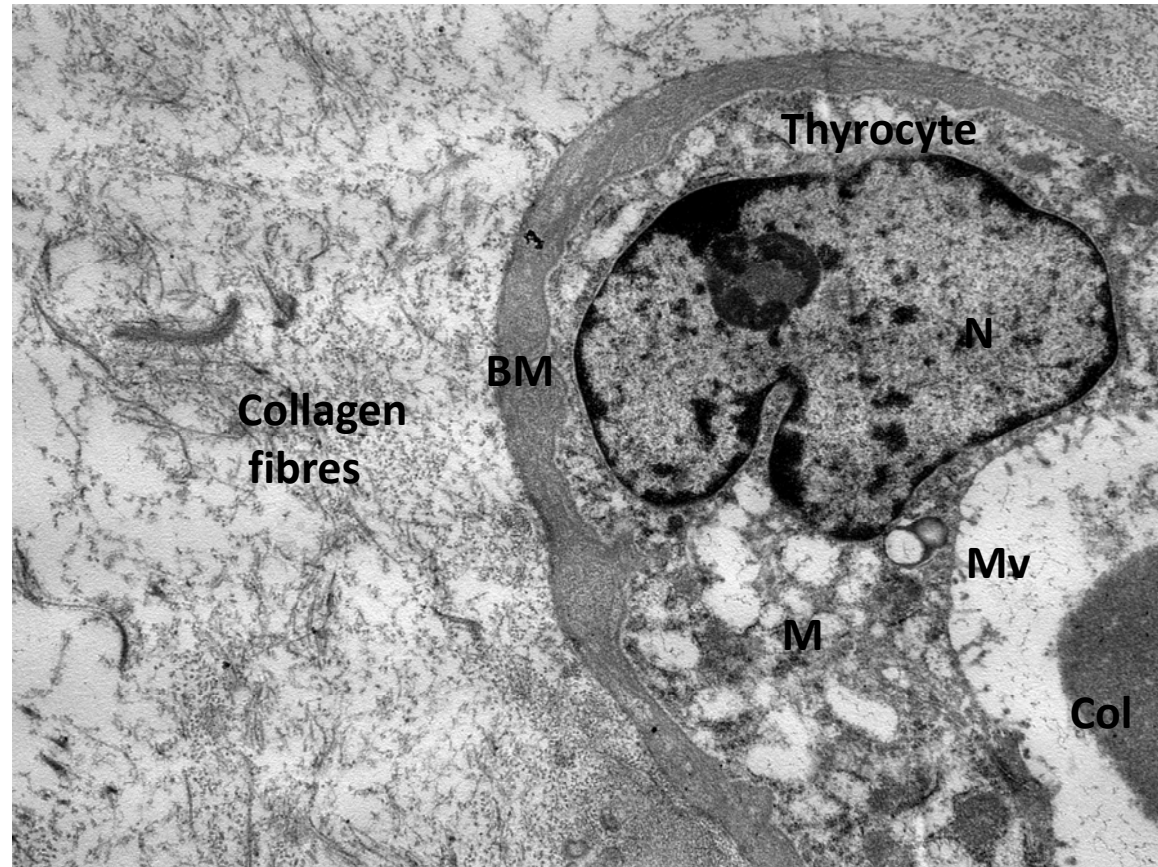

**Phot.5**

Supplement: Supplementary file 1 [file 1]
